# Supplementary material
Source: publisher figshare collection journal article supplement (https://gsajournals.figshare.com/articles/dataset/_/6873998)
Supplement: Supplementary file 1 [file 1]

## Sheet: reciprocal crosses RSA 2015
				Genotypes of pre-emergent pupae and parents from Experiment 1
	colony	sample		DNA Plate Name	Plate Number	run sample number	run sample number	A8				A14		A29			A79			A88			B124			A107			Ap43			A113			HB-The-03
3130 run						GB160407_191	GB160408_191_2	GB160407_191				GB160407_191		GB160407_191			GB160407_191			GB160408_191_2			GB160408_191_2			GB160408_191_2			GB160408_191_2			GB160427_196			GB160427_196
	Scutellata queen x Capensis drone	RSA2015-37	wing tip queen					168	175		220	226		134			94			139	147		215	229		147	157		129	135		217	229		182	186
	83AI38	RSA2015-52	drone	RSA2015 plate 2	72	168	360	170			214			125			98			138			231			160			159			215			174
	Queen 2a
		RSA2015-262	worker	RSA2015 plate 1	1	1	193	170	175		214			125	134		94	98		138	147		215	231		147	160		129	159		215	229		174	182
		RSA2015-262	worker	RSA2015 plate 1	2	2	194	170	175		214			125	134		98			139			215	231		147	160		129	159		215	217		174	182
		RSA2015-262	worker	RSA2015 plate 1	3	3	195							125	134		94	98		138	147		215	231		157	160		135	159		215	229		174	182
		RSA2015-262	worker	RSA2015 plate 1	4	4	196	168	170		214			125	134		98			138	147		229	231		157	160		135	159		215	229		174	182
		RSA2015-262	worker	RSA2015 plate 1	5	5	197	170	175		214			125	134		98			139			229	231		157	160		129	159		215	229		174	182
		RSA2015-262	worker	RSA2015 plate 1	6	6	198	168	170		214			125	134		94	98		139			215	231		157	160		135	159		215	217		174	182
		RSA2015-262	worker	RSA2015 plate 1	7	7	199	170	175		214			125	134		94	98		139			229	231		147	160		129	159		215	217		174	182
		RSA2015-262	worker	RSA2015 plate 1	8	8	200	168	170		214			125	134		98			139			229	231		147	160		135	159		215	229		174	186
		RSA2015-262	worker	RSA2015 plate 1	9	9	201	168	170		214			125	134		98			138	147		229	231		147	160		135	159		215	229		174	186
		RSA2015-262	worker	RSA2015 plate 1	10	10	202	168	170		214			125	134		98			138	147		215	231		147	160		135	159		215	217		174	182
		RSA2015-262	worker	RSA2015 plate 1	11	11	203	170	175		214			125	134		94	98		138	147		215	231		157	160		129	159		215	229		174	186
		RSA2015-262	worker	RSA2015 plate 1	12	12	204	168	170		214			125	134		98			138	147								135	159		215	229		174	186
	Scutellata queen x Capensis drone	RSA2015-34	wing tip queen					164	166		217 ??	218		127	128		98	118		141	145		219	227		147	151		121	168		215	217		180	186
	S1AI37	RSA2015-51	drone	RSA2015 plate 2	71	167	359	175			216			130			98			142			231			160			159			215			180
	Queen 2b
		RSA2015-263	worker	RSA2015 plate 1	13	13	205	164	175		216	218		128	130		98	118		142	145		219	231		147	160		121	159		215	217		180	186
		RSA2015-263	worker	RSA2015 plate 1	14	14	206	164	175		216			127	130		98			142	145		227	231		147	160		121	159		215			180	186
		RSA2015-263	worker	RSA2015 plate 1	15	15	207	164	175		216			127	130		98	118		142	145		227	231		147	160		121	159		215	217		180	186
		RSA2015-263	worker	RSA2015 plate 1	16	16	208	166	175		216			128	130		98	118		142			227	231		151	160		159	168		215			180	186
		RSA2015-263	worker	RSA2015 plate 1	17	17	209	166	175		216			127	130		98			142	145		227	231		151	160		121	159		215	217		180
		RSA2015-263	worker	RSA2015 plate 1	18	18	210	164	175		216	218		128			98	118		142	145		227	231		147	160		121	159		215			180	186
		RSA2015-263	worker	RSA2015 plate 1	19	19	211	166	175		216	218		128			98			142	145		219	231		151	160		159	168		215			180	186
		RSA2015-263	worker	RSA2015 plate 1	20	20	212	164	175		216			127	130		98	118		142			227	231					121	159		215	217		180	186
		RSA2015-263	worker	RSA2015 plate 1	21	21	213	166	175		216			127	130		98	118		142	145		219	231		147	160		121	159		215	217		180
		RSA2015-263	worker	RSA2015 plate 1	22	22	214	164	175		216			128	130		98			142			227	231		147	160		159	168					180	186
		RSA2015-263	worker	RSA2015 plate 1	23	23	215	164	175		216			127	130		98			142			219	231		151	160		159	168		215	217		180
		RSA2015-263	worker	RSA2015 plate 1	24	24	216	164	175		216			128	130		98	118		142			219	231		147	160		121	159		215	217		180
		RSA2015-263	worker	RSA2015 plate 1	25	25	217	166	175		216	218		127	130		98	118		142	145		227	231		147	160		121	159		215			180	186
		RSA2015-263	worker	RSA2015 plate 1	26	26	218	164	175		216			128			98	118		142	145		227	231		151	160		159	168		215	217		180	186
		RSA2015-263	worker	RSA2015 plate 1	27	27	219	164	175		216	218		128			98	118		142	145		219	231		151	160		159	168		215	217		180	186
		RSA2015-263	worker	RSA2015 plate 1	28	28	220	164	175		216			128	130		98	118		142	145		227	231		147	160		121	159					180	186
		RSA2015-263	worker	RSA2015 plate 1	29	29	221	164	175		216	218		127	130		98			142			219	231		151	160		159	168		215	217		180
		RSA2015-263	worker	RSA2015 plate 1	30	30	222	164	175		216			128	130		98			142	145		219	231		147	160		121	159		215	217		180
		RSA2015-263	worker	RSA2015 plate 1	31	31	223	166	175		216			128	130		98	118		142			219	231		151	160		159	168		215	217		180
		RSA2015-263	worker	RSA2015 plate 1	32	32	224	164	175								98			142	145		219	231		147	160		121	159		215			180	186
	Scutellata queen x Capensis drone	RSA2015-28	wing tip queen					170	175		219	230???		123	134		98	100		147	152		215	219		149			133	169		221	223		182
	84AI34	RSA2015-48	drone	RSA2015 plate 2	69	165	357	170			216			130			102			142			231			178			129			217			180
	Queen 2c
		RSA2015-264	worker	RSA2015 plate 1	33	33	225	170	175		216			130	134		100	102		142	152		219	231		149	178		129	169		217	221		180
		RSA2015-264	worker	RSA2015 plate 1	34	34	226	170			216			123	130		100	102		142	152		219	231		149	178		129	133		217	223		180
		RSA2015-264	worker	RSA2015 plate 1	35	35	227	170	175		216			123	130		98	102		142	147		215	231		149	178		129	169		217	223		180	182
		RSA2015-264	worker	RSA2015 plate 1	36	36	228	170			216			130	134		100	102		142	147								129	133		217	221		180
		RSA2015-264	worker	RSA2015 plate 1	37	37	229	170	175		216	219		123	130		100	102		142	147		219	231		149	178		129	133					180
		RSA2015-264	worker	RSA2015 plate 1	38	38	230	170			216	219		130	134		100	102		142	152		219	231		149	178		129	169		217	223		180	182
		RSA2015-264	worker	RSA2015 plate 1	39	39	231	170	175		216			123	130		100	102		142	152		215	231		149	178		129	133
		RSA2015-264	worker	RSA2015 plate 1	40	40	232	170			216			123	130		100	102		142	147		219	231		149	178		129	133		217	221		180
		RSA2015-264	worker	RSA2015 plate 1	41	41	233	170			216	219		130	134		100	102		142	152		215	231		149	178		129	133		217	223		180	182
		RSA2015-264	worker	RSA2015 plate 1	42	42	234	170			216	219		123	130		100	102		142	152		215	231		149	178		129	133		217	223		180	182
		RSA2015-264	worker	RSA2015 plate 1	43	43	235	170	175		216	219		130	134		100	102		142	152		219	231		149	178		129	133		217	223		180
		RSA2015-264	worker	RSA2015 plate 1	44	44	236	170			216			130	134		98	102		142	147		215	231		149	178		129	169		217	221		180	182
		RSA2015-264	worker	RSA2015 plate 1	45	45	237	170	175		216	219		123	130		100	102		142	147		219	231		149	178		129	169
		RSA2015-264	worker	RSA2015 plate 1	46	46	238	170			216	219		123	130		100	102		142	152		215	231		149	178		129	169		217	221		180	182
		RSA2015-264	worker	RSA2015 plate 1	47	47	239	170			216	219		130	134		100	102		142	147		215	231		149	178		129	169		217	221		180
		RSA2015-264	worker	RSA2015 plate 1	48	48	240	170	175		216			123	130		100	102		142	147		219	231		149	178		129	133		217	223		180	182
		RSA2015-264	worker	RSA2015 plate 1	49	49	241	170	175		216	219		123	130		100	102		142	152		215	231		149	178		129	169		217	223		180
		RSA2015-264	worker	RSA2015 plate 1	50	50	242	170	175		216	219		130	134		98	102		142	152		219	231		149	178		129	169		217	223		180
	Scutellata queen x Capensis drone	RSA2015-300	queen	RSA2015 plate 2	61	157	349	166	170		218			140			102	124		138	147		211			176			127	135		215	219		186
	81AI36	RSA2015-50	drone	RSA2015 plate 2	70	166	358	170			221			129			98			153			219			190			163			211			173
	Queen 2d
		RSA2015-265	worker	RSA2015 plate 1	51	51	243				218			129	140		98	124		147	153		211	219		176	190		127	163		211	215		173	186
		RSA2015-265	worker	RSA2015 plate 1	52	52	244	170			218			140			98	102		138	153		211	219		176	190		135	163		211	215		173	186
		RSA2015-265	worker	RSA2015 plate 1	53	53	245	170			218			129	140		98	124		147	153		211	219		176	190		135	163		211	215		173	186
		RSA2015-265	worker	RSA2015 plate 1	54	54	246	170			221			129			98	124		138	153		211	219		176	190		127	163		211	219		173	186
		RSA2015-265	worker	RSA2015 plate 1	55	55	247	170			218			129			98	124		147	153		211	219		176	190		135	163		211	215		173	186
		RSA2015-265	worker	RSA2015 plate 1	56	56	248	170						129	140		98	102		147	153		211	219		176	190		135	163		211	215		173	186
		RSA2015-265	worker	RSA2015 plate 1	57	57	249	166	170		218			140			98	102		147	153		211	219		176	190		135	163		211	215		173	186
		RSA2015-265	worker	RSA2015 plate 1	58	58	250	170						129			98	124		147	153		211	219		176	190		135	163		211	219		173	186
		RSA2015-265	worker	RSA2015 plate 1	59	59	251	166	170		218			129			98	124		138	153		211	219		176	190		135	163		211	215		173	186
		RSA2015-265	worker	RSA2015 plate 1	60	60	252	170			221			129			98	124		147	153		211	219		176	190		127	163		211	219		173	186
		RSA2015-265	worker	RSA2015 plate 1	61	61	253	166	170					129	140		98	102		147	153		211	219		176	190		135	163		211	215		173	186
		RSA2015-265	worker	RSA2015 plate 1	62	62	254	166	170					129			98	102		138	153		211	219		176	190		135	163		211	215		173	186
		RSA2015-265	worker	RSA2015 plate 1	63	63	255	170						129			98	124		147	153		211	219		176	190		127	163		211	215		173	186
		RSA2015-265	worker	RSA2015 plate 1	64	64	256	166	170					129			98	124		148	153		211	219		176	190		127	163		211	215		173	186
		RSA2015-265	worker	RSA2015 plate 1	65	65	257	170			218			129			98	102		147	153		211	219		176	190		127	163		211	219		173	186
		RSA2015-265	worker	RSA2015 plate 1	66	66	258	166	170		221			129			98	124		147	153		211	219		176	190		127	163		211	219		173	186
		RSA2015-265	worker	RSA2015 plate 1	67	67	259	170			221			129			98	102		138	153		211	219		176	190		127	163		211	215		173	186
		RSA2015-265	worker	RSA2015 plate 1	68	68	260	170			218			129			98	124		147	153		211	219		176	190		135	163		211	219		173	186
		RSA2015-265	worker	RSA2015 plate 1	69	69	261	166	170		218			129	140		98	124		138	153		211	219		176	190		127	163		211	219		173	186
		RSA2015-265	worker	RSA2015 plate 1	70	70	262	166	170		221			129			98	124		138	153		211	219		176	190		127	163		211	219		173	186
		RSA2015-265	worker	RSA2015 plate 1	71	71	263	166	170		218			140			98	102		147	153		211	219		176	190		135	163		211	219		173	186
		RSA2015-265	worker	RSA2015 plate 1	72	72	264	166	170		221			129	140		98	124		138	153		211	219		176	190		135	163		211	215		173	186
		RSA2015-265	worker	RSA2015 plate 1	73	73	265	166	170		218			129			98	102		147	153		211	219		176	190		135	163		211	215		173	186
		RSA2015-265	worker	RSA2015 plate 1	74	74	266	166	170		218			129	140		98	124		147	153		211	219		176	190		127	163		211	219		173	186
		RSA2015-265	worker	RSA2015 plate 1	75	75	267	166	170		221						98	124		138	153		211	219		176	190		135	163		211	215		173	186
	Capensis queen x Scutellata drone	RSA2015-402	queen	RSA2015 plate 2	64	160	352	166	170		214	221		129			96			132	145		219			164	176		125	129		215			174	190
	65AI33	RSA2015-47	drone	RSA2015 plate 2	68	164	356	170			217			127			98			141			219			147			121			221			180
	Queen 2e
		RSA2015-267	worker	RSA2015 plate 1	76	76	268	166	170		217	221		127	129		96	98		132	141		219			147	176		121	125		215	221		174	180
		RSA2015-267	worker	RSA2015 plate 1	77	77	269	170			214	217		127	129		96	98		141	145		219			147	176		121	125		215	221		180	190
		RSA2015-267	worker	RSA2015 plate 1	78	78	270	166	170		214	217		127			96	98		132	141		219			147	164		121	129		215	221		180	190
		RSA2015-267	worker	RSA2015 plate 1	79	79	271	166	170		214	217		127			96	98		132	141		219			147	164		121	129		215	221		174	180
		RSA2015-267	worker	RSA2015 plate 1	80	80	272	166	170		217	221		127			96	98		141	145		219			147	164		121	129		215	221		180	190
		RSA2015-267	worker	RSA2015 plate 1	81	81	273	166	170		217	221		127	129		96	98		132	141		219			147	176		121	129		215	221		174	180
		RSA2015-267	worker	RSA2015 plate 1	82	82	274	166	170		214	217		127	129		96	98		132	141		219			147	164		121	129		215	221		174	180
		RSA2015-267	worker	RSA2015 plate 1	83	83	275	166	170		214	217		127			96	98		132	141		219			147	176		121	129		215	221		180	190
		RSA2015-267	worker	RSA2015 plate 1	84	84	276	170			217	221		127			96	98		141	145		219			147	164		121	129		215	221		180	190
		RSA2015-267	worker	RSA2015 plate 1	85	85	277	166	170		217	221		127	129		96	98		132	141		219						121	129		215	221		174	180
		RSA2015-267	worker	RSA2015 plate 1	86	86	278	166	170		214	217	221?	127	129		96	98		132	141	145	219			147	164	176	121	125	129	215	221		174	180	190
		RSA2015-267	worker	RSA2015 plate 1	87	87	279	166	170		217	221		127			96	98		132	141		219			147	164		121	129		215	221		180	190
		RSA2015-267	worker	RSA2015 plate 1	88	88	280	170									96	98		132	141		219			147	164		121	125		215	221		180	190
		RSA2015-267	worker	RSA2015 plate 1	89	89	281	170			214	217		127	129		96	98		132	141		219			147	176		121	125		215	221		180	190
		RSA2015-267	worker	RSA2015 plate 1	90	90	282	166	170		214	217		127	129		96	98		141	145		219			147	176		121	125		215	221		180	190
		RSA2015-267	worker	RSA2015 plate 1	91	91	283	166	170		217	221		127			96	98		141	145		219			147	164		121	129		215	221		174	180
		RSA2015-267	worker	RSA2015 plate 1	92	92	284	170			217	221		127			96	98		142	145		219			147	164		121	125		215	221		180	190
		RSA2015-267	worker	RSA2015 plate 1	93	93	285	166	170		217	221		127			96	98		141	145								121	125		215	221		180	190
	Capensis queen x Scutellata drone	RSA2015-401	queen	RSA2015 plate 2	63	159	351	172			223	230??		130			98	104		139	148		219	233		180	184		129	137		223	227		186	188
	70AI29	RSA2015-43	drone	RSA2015 plate 2	65	161	353	166			224			137			98			145			230			147			133			217			180
	Queen 2f
		RSA2015-268	worker	RSA2015 plate 2	1	97	289	166	172		224			130	137		98			145	148		230	233		147	184		129	133		217	227		180	188
		RSA2015-268	worker	RSA2015 plate 2	2	98	290	166	172		223			130	137		98	104		139	145		219	230		147	180		133	137		217	223		180	188
		RSA2015-268	worker	RSA2015 plate 2	3	99	291	166	172		224			137			98			139	145		219	230		147	184		129	133		217	223		180	186
		RSA2015-268	worker	RSA2015 plate 2	4	100	292	166	172		223			130	137		98	104		139	145	148	219	230		147	180	184	129	133	137	217	223	227	180	186	188
		RSA2015-268	worker	RSA2015 plate 2	5	101	293	166	172		224			137			98			139	145		219	230		147	184		129	133		217	227		180	188
		RSA2015-268	worker	RSA2015 plate 2	6	102	294	166	172		224			130	137		98			145	148		219	230		147	184		129	133		217	227		180	188
		RSA2015-268	worker	RSA2015 plate 2	7	103	295	166	172		224			130	137		98	104		145	148		230	233		147	180		133	137		217	223		180	188
		RSA2015-268	worker	RSA2015 plate 2	8	104	296	166	172		224			137			98			139	145		230	233		147	184		129	133		217	227		180	186
		RSA2015-268	worker	RSA2015 plate 2	9	105	297	166	172		223			130	137		98			139	145		219	230		147	180		129	133		217	227		180	186
		RSA2015-268	worker	RSA2015 plate 2	10	106	298	166	172		224			137			98	104		139	145		219	230		147	184		129	133		217	223		180	186
		RSA2015-268	worker	RSA2015 plate 2	11	107	299	166	172		224			130	137		98			139	145		219	230		147	184		133	137		217	227		180	186
		RSA2015-268	worker	RSA2015 plate 2	12	108	300										98			145	148					147	180		129	133		217	227		180	188
		RSA2015-268	worker	RSA2015 plate 2	13	109	301	166	172		223			130	137		98			139	145		219	230		147	184		133	137		217	223		180	186
		RSA2015-268	worker	RSA2015 plate 2	14	110	302	166	172		224			137			98			145	148		230	233		147	180		133	137		217	223		180	188
		RSA2015-268	worker	RSA2015 plate 2	15	111	303	166	172		223			130	137		98			145	148		219	230		147	180		133	137		217	227		180	186
		RSA2015-268	worker	RSA2015 plate 2	16	112	304	166	172		223			130	137		98	104		139	145	148	219	230		147	180	184	133	137		217	223	227	180	186	188
		RSA2015-268	worker	RSA2015 plate 2	17	113	305	166	172		223			130	137		98			139	145		230	233		147	180		133	137		217	223		180	188
		RSA2015-268	worker	RSA2015 plate 2	18	114	306	166	172		223			137			98	104		139	145		219	230		147	180		133	137		217	227		180	186
		RSA2015-268	worker	RSA2015 plate 2	19	115	307	166	172		223			137			98			145	148		219	230		147	184		133	137		217	227		180	186
		RSA2015-268	worker	RSA2015 plate 2	20	116	308	166	172		224			130	137		98			139	145		230	233		147	184		129	133		217	227		180	188
	Capensis queen x Scutellata drone	RSA2015-400	queen	RSA2015 plate 2	62	158	350	168	170		219	223	219 real?	130	139		96			143	148		215	233		147	184		129	161		215	227		184	188
	72AI32	RSA2015-46	drone	RSA2015 plate 2	67	163	355	166			224			137			98			141			219			147			133			221			180
	Queen 2g
		RSA2015-269	worker	RSA2015 plate 2	21	117	309	166	168		224						96	98		141	148		219	233		147			129	133		215	221		180	188
		RSA2015-269	worker	RSA2015 plate 2	22	118	310	166	168	170	223			130	137	139	96	98		143	148		215	219	233	147	184		133	161		215	221	227	180	184	188
		RSA2015-269	worker	RSA2015 plate 2	23	119	311	166	170		223			130	137		96	98		141	148		215	219		147	184		129	133		221	227		180	184
		RSA2015-269	worker	RSA2015 plate 2	24	120	312	166	168		223						96	98		143			215	219					133	161		221	227		180	184
		RSA2015-269	worker	RSA2015 plate 2	25	121	313	166	170		219	224		130	137		96	98		141	148		219	233		147			129	133		221	227		180	184
		RSA2015-269	worker	RSA2015 plate 2	26	122	314	166	168		223			130	137	139	96	98		143	148		215	219	233	147	184		129	133	161	215	221	227	180	184	188
		RSA2015-269	worker	RSA2015 plate 2	27	123	315	166	168		219	224		130	137	139	96	98		143	148		215	219	233	147	184		129	133	161	215	221		180	184	188
		RSA2015-269	worker	RSA2015 plate 2	28	124	316	166	168		223						96	98		141	148		215	219		147			133	161
		RSA2015-269	worker	RSA2015 plate 2	29	125	317	166	170		223			130	137		96	98		141	148		215	219		147	184		129	133		215	221		180	188
		RSA2015-269	worker	RSA2015 plate 2	30	126	318	166	168		223			130	137	139	96	98		143	148		215	219	233	147	184		129	133	161	215	221		180	184	188
		RSA2015-269	worker	RSA2015 plate 2	31	127	319	166	168	170	223						96	98		143	148		215	219	233	147	184		129	133	161	215	221	227	180	184	188
		RSA2015-269	worker	RSA2015 plate 2	32	128	320	166	168		223						96	98		141	149		215	219		147	184		129	133		215	221		180	188
		RSA2015-269	worker	RSA2015 plate 2	33	129	321	166	168		223			130	137		96	98		143			219	233		147	184		129	133		221	227		180	188
		RSA2015-269	worker	RSA2015 plate 2	34	130	322	166	168		224			130	137		96	98		141	148		215	219		147	184		129	133		221	227		180	188
		RSA2015-269	worker	RSA2015 plate 2	35	131	323	166	168	170	223			130	137	139	96	98		143	?		215	219		147	184		129	133	161	215	221	227	180	184	188
		RSA2015-269	worker	RSA2015 plate 2	36	132	324	166	168					130	137		96	98		143			219	233		147	184		133	161		215	221		180	184
		RSA2015-269	worker	RSA2015 plate 2	37	133	325	166	170		223			130	137		96	98		141	148		219	233		147	184		129	133		215	221		180	188
		RSA2015-269	worker	RSA2015 plate 2	38	134	326	166	170		219	224		130	137		96	98		143			215	219		147	184		129	133		221	227		180	184
		RSA2015-269	worker	RSA2015 plate 2	39	135	327	166	170		219	224					96	98		143			215	219		147			129	133		221	227		180	184
		RSA2015-269	worker	RSA2015 plate 2	40	136	328	166	170								96	98		143			219	233		147			129	133		221	227		180	188
	Capensis queen x Scutellata drone	RSA2015-26	wing tip queen					170	175		220	221		130	139		102	116		138	153		219	238		176	190		131	133		211	217		173	174
	71AI31	RSA2015-45	drone	RSA2015 plate 2	66	162	354	166			217			127			118			141			219			160			133			221			180
	Queen 2h
		RSA2015-270	worker	RSA2015 plate 2	41	137	329	166	170		217	221		127	139		116	118		141	153		219	238		160	176		131	133		217	221		173	180
		RSA2015-270	worker	RSA2015 plate 2	42	138	330	166	170		217	220		127	130		102	118		138	141		219			160	176		133			217	221		174	180
		RSA2015-270	worker	RSA2015 plate 2	43	139	331	166	170		217	221		127	130		102	118		138	141		219			160	190		133			211	221		173	180
		RSA2015-270	worker	RSA2015 plate 2	44	140	332	166	175					127	139		116	118		141	153								131	133		211	221		173	180
		RSA2015-270	worker	RSA2015 plate 2	45	141	333	166	170		217	220		127	130		102	118		138	141		219			160	176		133			211	221		174	180
		RSA2015-270	worker	RSA2015 plate 2	46	142	334	166	170					127	139		116	118		138	141		219	238		160	190		133			211	221		174	180
		RSA2015-270	worker	RSA2015 plate 2	47	143	335	166	175		217	220		127	139		102	118		138	141		219	238		160	190		133			211	221		174	180
		RSA2015-270	worker	RSA2015 plate 2	48	144	336	166	170		217	221		127	139		102	118		138	141		219			160	190		131	133		217	221		173	180
		RSA2015-270	worker	RSA2015 plate 2	49	145	337	166	170		217	221		127	130		116	118		138	141		219			160	176		133			211	221		174	180
		RSA2015-270	worker	RSA2015 plate 2	50	146	338	166	175		217	221		127	139		116	118		141	153		219	238		160	176		133			217	221		174	180
		RSA2015-270	worker	RSA2015 plate 2	51	147	339	166	170		217	220		127	130		102	118		141	153		219			160	176		133			211	221		173	180
		RSA2015-270	worker	RSA2015 plate 2	52	148	340	166	175		217	221		127	130		102	118		138	141		219			160	190		133			211	221		174	180
		RSA2015-270	worker	RSA2015 plate 2	53	149	341	166	175		217	220		127	139		116	118		141	153		219			160	176		133						174	180
		RSA2015-270	worker	RSA2015 plate 2	54	150	342	166	170					127	139		102	118		141	153		219	238		160	190		131	133		217	221		173	180
		RSA2015-270	worker	RSA2015 plate 2	55	151	343	166	170					127	130		102	118		141	153		219	238		160	190		131	133		211	221		174	180
		RSA2015-270	worker	RSA2015 plate 2	56	152	344	166	170	175	217	220		127	130	139	102	116	118	138	141	153	219	238		160	176	190	131	133		211	217	221	173	174	180
		RSA2015-270	worker	RSA2015 plate 2	57	153	345	166	170		217	220		127	139		116	118		141	153		219	238		160	176		131	133		217	221		173	180
		RSA2015-270	worker	RSA2015 plate 2	58	154	346	166	170		217	220		127	130		116	118		141	153		219			160	190		133			217	221		174	180
		RSA2015-270	worker	RSA2015 plate 2	59	155	347	166	175					127	139		116	118		141	153		219			160	176		131	133
		RSA2015-270	worker	RSA2015 plate 2	60	156	348	166	170		217	221		127	139		116	118		141	153		219	238		160	190		133			217	221		174	180
Extraction of queens		RSA2015-300	queen	RSA2015 plate 2	61	157	349	166	170		218			140			102	124		138	147		211			176			127	135		215	219		186
		RSA2015-400	queen	RSA2015 plate 2	62	158	350	168	170		219	223		130	139		96			143	148		215	233					129	161		215	227		184	188
		RSA2015-401	queen	RSA2015 plate 2	63	159	351	172			223			130	140		98	104		139	148		219	233		180	184		129	137		223	227		186	188
		RSA2015-402	queen	RSA2015 plate 2	64	160	352	166	170		214			129	140		96			132	145		219			164	176		125	129
Extraction of drones		RSA2015-43	drone	RSA2015 plate 2	65	161	353	166			224			137			98			145			230			147			133			217			180
		RSA2015-45	drone	RSA2015 plate 2	66	162	354	166			217			127			118			141			219			160			133			221			180
		RSA2015-46	drone	RSA2015 plate 2	67	163	355	166			224			137			98			141			219			147			133			221			180
		RSA2015-47	drone	RSA2015 plate 2	68	164	356	170			217			127			98			141			219			147			121			221			180
		RSA2015-48	drone	RSA2015 plate 2	69	165	357	170			216			130			102			142			231			178			129			217			180
		RSA2015-50	drone	RSA2015 plate 2	70	166	358	170			221			129			98			153			219			190			163			211			173
		RSA2015-51	drone	RSA2015 plate 2	71	167	359	175			216			130			98			142			231			160			159			215			180
		RSA2015-52	drone	RSA2015 plate 2	72	168	360	170			214			125			98			138			231			160			159			215			174
Extraction of queen wing tips		RSA2015-24	queen wing tip	queen 401	169	193	217	172			223	230???		130			98	104		139	148		219	233		180	184		129	137		223	227		186	188
		RSA2015-26	queen wing tip		170	194	218	170	175		220	221		130	139		102	116		138	153		219	238		176	190		131	133		211	217		173	174
		RSA2015-28	queen wing tip		171	195	219	170	175		219	230???		123	134		98	100		147	152		215	219		149			133	169		221	223		182
		RSA2015-29	queen wing tip	does not match queen 300!!!	172	196	220	166	175		215	226		133	140		98	112		138	152		219	248		161	176		133	135
		RSA2015-30	queen wing tip	queen 400	173	197	221	168	170		223	???		130	139		96			143	148		215	233		147	184		129	161		215	227		184	188
		RSA2015-34	queen wing tip		174	198	222	164	166		217???	218		127	128		98	118		141	145		219	227		147	151		121	168		215	217		180	186
		RSA2015-37	queen wing tip		175	199	223	168	175		220	226		134			94			139	147		215	229		147	157		129	135		217	229		182	186
		RSA2015-41	queen wing tip	queen 402	176	200	224	166	170		214	221		129			96			132	145		219			164	176		125	129		215			174	190
											A14 marker PCRs did not work very well, difficult to score the peaks
	65AI33	1 out of 18 workers triploid
	70AI29	2 out of 20 workers triploid
	72AI32	6 out of 18 workers triploid
	71AI31	1 out of 18 workers triploid
	Total Scored	74
	Number of triploids	10
	Proportion triploid	0.135135

## Sheet: comparison triploids   
Genotypes of different tissues from 3-allele pupae Experiment 1.
	colony	sample		DNA Plate Name		run sample number			A8				A14		A29			A79			A88			B124			A107			Ap43			A113			HB-The-03			CSD (Am_CSD_ex7-F3/ex8-R2)			sex1			sex3			UN351
3130 run					GB160410_195	GB160407_191	GB160408_191_2	GB160826_241_1	GB160407_191 & GB160413_195				GB160407_191 & GB160413_195		GB160407_191 & GB160413_195			GB160407_191 & GB160413_195			GB160407_191 & GB160413_195			GB160407_191 & GB160413_195			GB160407_191 & GB160413_195			GB160407_191 & GB160413_195			GB160427_196			GB160427_196			GB160426_195
	Capensis queen x Scutellata drone	RSA2015-402	queen	RSA2015 plate 2		160	352		166	170		214	221		129			96			132	145		219			164	176		125	129		215			174	190		237	249
	65AI33	RSA2015-47	drone	RSA2015 plate 2		164	356		170			217			127			98			141			219			147			121			221			180			235
1st extraction hind leg		RSA2015-267 # 86	worker	RSA2015 plate 1		86	278		166	170		214	217	221?	127	129		96	98		132	141	145	219			147	164	176	121	125	129	215	221		174	180	190	237	249
2nd extraction front leg		RSA2015-267 # 86	worker	RSA2015 plate 1	177	201	225		166	170		214	217	221	127	129		96	98		132	142	145	219			147	164	176	121	125	129	215	221		174	180	190	237	249
	Capensis queen x Scutellata drone	RSA2015-401	queen	RSA2015 plate 2		159	351		172			223	230??		130			98	104		139	148		219	233		180	184		129	137		223	227		186	188		264
	70AI29	RSA2015-43	drone	RSA2015 plate 2		161	353		166			224			137			98			145			230			147			133			217			180			253
1st extraction hind leg		RSA2015-268 #4	worker	RSA2015 plate 2		100	292		166	172		223			130	137		98	104		139	145	148	219	230		147	180	184	129	133	137	217	223	227	180	186	188	264
2nd extraction front leg		RSA2015-268 #4	worker	RSA2015 plate 2	178	202	226		166	172		223			130	137		98	104		139	145	149	219	230		147	180	184	129	133	137	217	223	227	180	186	188	264
1st extraction hind leg		RSA2015-268 # 16	worker	RSA2015 plate 2		112	304		166	172		223			130	137		98	104		139	145	148	219	230		147	180	184	133	137		217	223	227	180	186	188	264
2nd extraction front leg		RSA2015-268 # 16	worker	RSA2015 plate 2	179	203	227		166	172		223			130	137		98	104		139	145	148	219	230		147	180	184	133	137		217	223	227	180	186	188	264
	Capensis queen x Scutellata drone	RSA2015-400	queen	RSA2015 plate 2	62	158	350		168	170		219 ?	223		130	139		96			143	148		215	233		147	184		129	161		215	227		184	188		240	246		150			195	207		162
	72AI32	RSA2015-46	drone	RSA2015 plate 2	67	163	355		166			224			137			98			141			219			147			133			221			180			253			146			194			149
1st extraction hind leg		RSA2015-269 # 22	worker	RSA2015 plate 2		118	310		166	168	170	223			130	137	139	96	98		143	148		215	219	233	147	184		133	161		215	221	227	180	184	188				146	150		194	207		162
2nd extraction front leg		RSA2015-269 # 22	worker	RSA2015 plate 2	180	204	228		166	168	170	223			130	137	139	96	98		143	148		215	219	233	147	184		133	161		215	221	227	180	184	188				146	150		194	207		162
3rd extraction sting		RSA2015-269 # 22	worker	RSA2015 plate 2				16	166	168	170	223						96	98		143	149		215	219	233	147	184		133	161		215	221	227	180	184	188				146	150		194	207		162
1st extraction hind leg		RSA2015-269 # 26	worker	RSA2015 plate 2		122	314		166	168		223			130	137	139	96	98		143	148		215	219	233	147	184		129	133	161	215	221	227	180	184	188				146	150		194	195	207	162
2nd extraction front leg		RSA2015-269 # 26	worker	RSA2015 plate 2	181	205	229		166	168		223			130	137	139	96	98		143	148		215	219	233	147	184		129	133	161	215	221	227	180	184	188	253			146	150		194	195	207	162
3rd extraction sting		RSA2015-269 # 26	worker	RSA2015 plate 2				20	166	168		223						96	98		143	148		215	219	233	147	184		129	133	161	215	221	227	180	184	188				146	150		194	195	207	162
1st extraction hind leg		RSA2015-269 # 27	worker	RSA2015 plate 2		123	315		166	168		219	224		130	137	139	96	98		143	148		215	219	233	147	184		129	133	161	215	221		180	184	188	253			146	150		194	195	207	162
2nd extraction front leg		RSA2015-269 # 27	worker	RSA2015 plate 2	182	206	230		166	168		219	224		130	137	139	96	98		143	148		215	219	233	147	184		129	133	161	215	221		180	184	188	253			146	150		194	195	207	162
3rd extraction sting		RSA2015-269 # 27	worker	RSA2015 plate 2				21	166	168		219	224					96	98		143	148		215	219	233	147	?	weak peaks	129	133	161	215	221		180	184	188				146	150		194	195	207	162
1st extraction hind leg		RSA2015-269 # 30	worker	RSA2015 plate 2		126	318		166	168		223			130	137	139	96	98		143	148		215	219	233	147	184		129	133	161	215	221		180	184	188				146	150		194	207		162
2nd extraction front leg		RSA2015-269 # 30	worker	RSA2015 plate 2	183	207	231		166	168		223			130	137	139	96	98		143	148		215	219	233	147	184		129	133	161	215	221		180	184	188	253			146	150		194	207		162
3rd extraction sting		RSA2015-269 # 30	worker	RSA2015 plate 2				24	166	168		219	223					96	98		143	148		215	219	233	147	184		129	133	161	215	221		180	184	188				146	150		194	207		162
1st extraction hind leg		RSA2015-269 # 31	worker	RSA2015 plate 2		127	319		166	168	170	223						96	98		143	148		215	219	233	147	184		129	133	161	215	221	227	180	184	188				146	150		194	195	207	162
2nd extraction front leg		RSA2015-269 # 31	worker	RSA2015 plate 2	184	208	232		166	168	170	223			130	137	139	96	98		143	148		215	219	233	147	184		129	133	161	215	221	227	180	184	188				146	150		194	195	207	162
3rd extraction sting		RSA2015-269 # 31	worker	RSA2015 plate 2				25	166	168	170	223						96	98		143	148		215	219	233	147	184		129	133	161	215	221	227	180	184	188	257			146	150		194	195	207	162
1st extraction hind leg		RSA2015-269 # 35	worker	RSA2015 plate 2		131	323		166	168	170	223			130	137	139	96	98		143			215	219		147	184		129	133	161	215	221	227	180	184	188				146	150		194	195	207	162
2nd extraction front leg		RSA2015-269 # 35	worker	RSA2015 plate 2	185	209	241		166	168	170	219	223		130	137	139	96	98		143			215	219		147	184		129	133	161	215	221	227	180	184	188	238	253		146	150		194	195	207	162
3rd extraction sting		RSA2015-269 # 35	worker	RSA2015 plate 2				29	166	168	170	223						96	98		143			215	219		147	184		129	133	161	215	221	227	180	184	188	257			146	150		194	195	207	162
	Capensis queen x Scutellata drone	RSA2015-26	wing tip queen						170	175		220	221		130	139		102	116		138	153		219	238		176	190		131	133		211	217		173	174		246	249
	71AI31	RSA2015-45	drone	RSA2015 plate 2	66	162	354		166			217			127			118			141			219			160			133			221			180			235
1st extraction hind leg		RSA2015-270 # 56	worker	RSA2015 plate 2		152	344		166	170	175	217	220		127	130	139	102	116	118	138	141	153	219	238		160	176	190	131	133		211	217	221	173	174	180	246	249
2nd extraction front leg		RSA2015-270 # 56	worker	RSA2015 plate 2	186	210	242		166	170	175	217	220		127	130	139	102	116	118	138	141	153	219	238		160	176	190	131	133		211	217	221	173	174	180	246	249
												A14 difficult to score in all PCSs
			% triploid
65AI33	1 out of 18 workers triploid		0.0555556
70AI29	2 out of 20 workers triploid		0.1
72AI32	6 out of 18 workers triploid		0.333333
71AI31	1 out of 18 workers triploid		0.0555556
		Average	0.136111
RSA2015-269	worker	RSA2015 plate 2	F3	22		16
RSA2015-269	worker	RSA2015 plate 2	G3	23		17	146	150		194	207		162			166	170		223						96	98		141	148		215	219		147	184		129	133		221	227		180	184		257
RSA2015-269	worker	RSA2015 plate 2	H3	24		18	146	150		194	207		162			166	168		223						96	98		143			215	219		147			133	161		221	227		180	184		257
RSA2015-269	worker	RSA2015 plate 2	A4	25		19	146			194	195		149			166	170		219	224					96	98		141	148		219	233		147			129	133		221	227		180	184		257
RSA2015-269	worker	RSA2015 plate 2	B4	26		20
RSA2015-269	worker	RSA2015 plate 2	C4	27		21
RSA2015-269	worker	RSA2015 plate 2	D4	28		22	146	150		194	207		162			166	168		223						96	98		141	148		215	219		147			133	161		221	227		180	184		257
RSA2015-269	worker	RSA2015 plate 2	E4	29		23	146			194	195		149			166	170		223						96	98		141	148		215	219		147	184		129	133		215	221		180	188		257
RSA2015-269	worker	RSA2015 plate 2	F4	30		24
RSA2015-269	worker	RSA2015 plate 2	G4	31		25
RSA2015-269	worker	RSA2015 plate 2	H4	32		26	146			194	195		149			166	168		223						96	98		141	148		215	219		147	184		129	133		215	221		180	188
RSA2015-269	worker	RSA2015 plate 2	A5	33		27	146			194	195		149			166	168		223						96	98		143			219	233		147	184		129	133		221	227		180	188		257
RSA2015-269	worker	RSA2015 plate 2	B5	34		28	146			194	195		149			166	168		219	224					96	98		141	148		215	219		147	184		129	133		221	227		180	188		257
RSA2015-269	worker	RSA2015 plate 2	C5	35		29

## Sheet: comparison diploids RSA2015-269
		Genotypes of diploid pupae Experiment 1 (controls)
	extraction	colony	sample	DNA Plate Name	well	plate position	extraction number	3130 run sample number			A8			A14			A29			A79			A88			B124			A107			Ap43			A113			HB-The-03			CSD (Am_CSD_ex7-F3/ex8-R2)			sex1			sex3
3130 run											GB160407_191 & GB160829_241 & GB160901_243			GB160407_191 & GB160829_241 & GB160901_243			GB160407_191 & GB160829_241 & GB160901_243			GB160407_191 & GB160829_241 & GB160901_243			GB160408_191_2 & GB160829_241 & GB160901_243			GB160408_191_2 & GB160829_241 & GB160901_243			GB160408_191_2 & GB160829_241 & GB160901_243			GB160408_191_2 & GB160829_241 & GB160901_243			GB160427_196 & GB160829_241 & GB160901_243			GB160427_196 & GB160829_241 & GB160901_243			GB160427_196 & GB160829_241 & GB160901_243			GB160901_243			GB160901_243
Capensis queen x Scutellata drone	1st extraction hind leg	RSA2015-269	worker	RSA2015 plate 2	E3	21	1	21	117	309	166	168			224		A29 failed in PCRs for 2nd and 3rd extraction			96	98		141	148		219	233		147			129	133		215	221		180	188			all peaks very weak, not real???		146			194	195
72AI32	2nd extraction front leg	RSA2015-269	worker	RSA2015 plate 2	E3	21	1	1			166	168		223						96	98		141	148		219	233		147			129	133		215	221		180	188		257			146			194	195
	3rd extraction sting	RSA2015-269	worker	RSA2015 plate 2	E3	21	15	15			166	168		223						96	98		141	148		219	233		147			129	133		215	221		180	188					146			194	195
diploid workers
	1st extraction hind leg	RSA2015-269	worker	RSA2015 plate 2	G3	23	2	23	119	311	166	170		223			130	137		96	98		141	148		215	219		147	184		129	133		221	227		180	184					146	150		194	207
	2nd extraction front leg	RSA2015-269	worker	RSA2015 plate 2	G3	23	2	2			166	170		223						96	98		141	148		215	219		147	184		129	133		221	227		180	184		257			146	150		194	207
	3rd extraction sting	RSA2015-269	worker	RSA2015 plate 2	G3	23	17	17			166	170		223						96	98		141	148		215	219		147	184		129	133		221	227		180	184		257			146	150		194	207
	1st extraction hind leg	RSA2015-269	worker	RSA2015 plate 2	H3	24	3	24	120	312	166	168		223						96	98		143			215	219					133	161		221	227		180	184		253			146	150		194	207
	2nd extraction front leg	RSA2015-269	worker	RSA2015 plate 2	H3	24	3	3			166	168		223						96	98		143			215	219		147			133	161		221	227		180	184		257			146	150		194	207
	3rd extraction sting	RSA2015-269	worker	RSA2015 plate 2	H3	24	18	18			166	168		223						96	98		143			215	219		147			133	161		221	227		180	184		257			146	150		194	207
	1st extraction hind leg	RSA2015-269	worker	RSA2015 plate 2	A4	25	4	25	121	313	166	170		219	224		130	137		96	98		141	148		219	233		147			129	133		221	227		180	184					146			194	195
	2nd extraction front leg	RSA2015-269	worker	RSA2015 plate 2	A4	25	4	4			166	170		219	224					96	98		141	148		219	233		147			129	133		221	227		180	184					146			194	195
	3rd extraction sting	RSA2015-269	worker	RSA2015 plate 2	A4	25	19	19			166	170		219	224					96	98		141	148		219	233		147			129	133		221	227		180	184		257			146			194	195
	1st extraction hind leg	RSA2015-269	worker	RSA2015 plate 2	D4	28	5	28	124	316	166	168		223						96	98		141	148		215	219		147			133	161											146	150		194	207
	2nd extraction front leg	RSA2015-269	worker	RSA2015 plate 2	D4	28	5	5			166	168		223						96	98		141	148		215	219		147			133	161		221	227		180	184		257			146	150		194	207
	3rd extraction sting	RSA2015-269	worker	RSA2015 plate 2	D4	28	22	22			166	168		223						96	98		141	148		215	219		147			133	161		221	227		180	184		257			146	150		194	207
	1st extraction hind leg	RSA2015-269	worker	RSA2015 plate 2	E4	29	6	29	125	317	166	170		223			130	137		96	98		141	148		215	219		147	184		129	133		215	221		180	188		253			146			194	195
	2nd extraction front leg	RSA2015-269	worker	RSA2015 plate 2	E4	29	6	6			166	170		223						96	98		141	148		215	219		147	184		129	133		215	221		180	188					146			194	195
	3rd extraction sting	RSA2015-269	worker	RSA2015 plate 2	E4	29	23	23			166	170		223						96	98		141	148		215	219		147	184		129	133		215	221		180	188		257			146			194	195
	1st extraction hind leg	RSA2015-269	worker	RSA2015 plate 2	H4	32	7	32	128	320	166	168		223						96	98		141	149		215	219		147	184		129	133		215	221		180	188		253			146			194	195
	2nd extraction front leg	RSA2015-269	worker	RSA2015 plate 2	H4	32	7	7			166	168		223						96	98		141	148		215	219		147	184		129	133		215	221		180	188		257			146			194	195
	3rd extraction sting	RSA2015-269	worker	RSA2015 plate 2	H4	32	26	26			166	168		223						96	98		141	148		215	219		147	184		129	133		215	221		180	188					146			194	195
	1st extraction hind leg	RSA2015-269	worker	RSA2015 plate 2	A5	33	8	33	129	321	166	168		223			130	137		96	98		143			219	233		147	184		129	133		221	227		180	188		253			146			194	195
	2nd extraction front leg	RSA2015-269	worker	RSA2015 plate 2	A5	33	8	8			166	168		223						96	98		143			219	233		147	184		129	133		221	227		180	188		257			146			194	195
	3rd extraction sting	RSA2015-269	worker	RSA2015 plate 2	A5	33	27	27			166	168		223						96	98		143			219	233		147	184		129	133		221	227		180	188		257			146			194	195
	1st extraction hind leg	RSA2015-269	worker	RSA2015 plate 2	B5	34	9	34	130	322	166	168			224		130	137		96	98		141	148		215	219		147	184		129	133		221	227		180	188					146			194	195
	2nd extraction front leg	RSA2015-269	worker	RSA2015 plate 2	B5	34	9	9			166	168		219	224					96	98		141	148		215	219		147	184		129	133		221	227		180	188		257			146			194	195
	3rd extraction sting	RSA2015-269	worker	RSA2015 plate 2	B5	34	28	28			166	168		219	224					96	98		141	148		215	219		147	184		129	133		221	227		180	188		257			146			194	195
	1st extraction hind leg	RSA2015-269	worker	RSA2015 plate 2	D5	36	10	36	132	324	166	168					130	137		96	98		143			219	233		147	184		133	161		215	221		180	184					146	150		194	207
	2nd extraction front leg	RSA2015-269	worker	RSA2015 plate 2	D5	36	10	10			166	168		219	224					96	98		143			219	233		147	184		133	161		215	221		180	184		257			146	150		194	207
	3rd extraction sting	RSA2015-269	worker	RSA2015 plate 2	D5	36	30	30			166	168		219	224					96	98		143			219	233		147	184		133	161		215	221		180	184		257
	1st extraction hind leg	RSA2015-269	worker	RSA2015 plate 2	E5	37	11	37	133	325	166	170		223			130	137		96	98		141	148		219	233		147	184		129	133		215	221		180	188					146			194	195
	2nd extraction front leg	RSA2015-269	worker	RSA2015 plate 2	E5	37	11	11			166	170		223						96	98		141	148		219	233		147	184		129	133		215	221		180	188					146			194	195
	3rd extraction sting	RSA2015-269	worker	RSA2015 plate 2	E5	37	31	31			166	170		223						96	98		141	148		219	233		147	184		129	133		215	221		180	188					146			194	195
	1st extraction hind leg	RSA2015-269	worker	RSA2015 plate 2	F5	38	12	38	134	326	166	170		219	224		130	137		96	98		143			215	219		147	184		129	133		221	227		180	184					146			194	195
	2nd extraction front leg	RSA2015-269	worker	RSA2015 plate 2	F5	38	12	12			166	170		219	224					96	98		143			215	219		147	184		129	133		221	227		180	184		257			146			194	195
	3rd extraction sting	RSA2015-269	worker	RSA2015 plate 2	F5	38	32	32			166	170		219	224					96	98		143			215	219		147	184		129	133		221	227		180	184					146			194	195
	1st extraction hind leg	RSA2015-269	worker	RSA2015 plate 2	G5	39	13	39	135	327	166	170		219	224					96	98		143			215	219		147			129	133		221	227		180	184					146			194	195
	2nd extraction front leg	RSA2015-269	worker	RSA2015 plate 2	G5	39	13	13			166	170		219	224					96	98		143			215	219		147			129	133		221	227		180	184		257
	3rd extraction sting	RSA2015-269	worker	RSA2015 plate 2	G5	39	33	33			166	170		219	224					96	98		143			215	219		147			129	133		221	227		180	184		257			146			194	195
	1st extraction hind leg	RSA2015-269	worker	RSA2015 plate 2	H5	40	14	40	136	328	166	170								96	98		143			219	233		147			129	133		221	227		180	188		253			146			194	195
	2nd extraction front leg	RSA2015-269	worker	RSA2015 plate 2	H5	40	14	14			166	170		219	224					96	98		143			219	233		147			129	133		221	227		180	188					146			194	195
	3rd extraction sting	RSA2015-269	worker	RSA2015 plate 2	H5	40	34	34			166	170		219	224					96	98		143			219	233		147			129	133		221	227		180	188					146			194	195
														A14 difficult to score in all PCSs
[truncated: 1 more columns]
